# Supplementary material for: Monatomic reactions with single vacancy monolayer h-BN: DFT studies
Source: Royal Society of Chemistry journal article supplement (doi:10.1039/d3ra05108k), 2023-01-01
Supplement: d3ra05108k1.pdf [file d3ra05108k1.pdf]

**Supplementary Materials (SM) for  
Monatomic reactions with single vacancy monolayer *h*-BN: DFT studies**

Nicholas Mondinos<sup>1</sup>, Mohammednoor Altarawneh<sup>2\*</sup>, Amun Amri<sup>3</sup>, Willey Yun Hsien Liew<sup>4</sup>,  
Gerrard Eddy Jai Poinern<sup>5</sup>, Zhong-Tao Jiang<sup>1\*\*</sup>,

<sup>1</sup>Surface Analysis and Materials Engineering Research Group, College of Science, Health,  
Engineering and Education, Murdoch University, Murdoch, WA 6150, Australia

<sup>2</sup>Department of Chemical and Petroleum Engineering, United Arab Emirates University, 15551,  
United Arab Emirates

<sup>3</sup>Department of Chemical Engineering, Universitas Riau, Pekanbaru, Indonesia

<sup>4</sup>Faculty of Engineering, Universiti Malaysia Sabah, Jalan UMS, 88400, Kota Kinabalu, Sabah,  
Malaysia

<sup>5</sup>Murdoch Applied Innovation Nanotechnology Research Group, College of Science, Health,  
Engineering and Education, Murdoch University, Murdoch, WA 6150, Australia

Corresponding authors emails: [mn.altarawneh@uaeu.ac.ae](mailto:mn.altarawneh@uaeu.ac.ae)\*; [Z.Jiang@murdoch.edu.au](mailto:Z.Jiang@murdoch.edu.au)\*\*

Implementation of VASP code

The BN monolayer is modelled on a (8x4) supercell consisting of 128 atoms with cell dimensions;  $\mathbf{x} = 20.4478 \text{ \AA}$ ,  $\mathbf{y} = 17.7084 \text{ \AA}$ ,  $\mathbf{z} = 22.1739 \text{ \AA}$ . The calculations for adsorption energies had a maximum of three different atomic species (B, N, and Atom). To minimize errors, calculations for isolated atom, of the surface only, and of the (adsorbate + surface) are done with an identical supercell, energy cut-off and with the following VASP parameters:

ENCUT = 570 eV (ensures it is  $\sim 1.3 \times E_{\text{max}}$ ), PREC = Accurate, LREAL = Auto, LMAXMIN = 2, ISYM = 0 (not use symmetry), ISMEAR = 0 (Gaussian smearing; partial occupancies for each orbital), IBRION = 2 (CGA; ionic relaxation), IVDW = 1 and VDW\_S6 = 0.75 (vdW correction), ENAUG = 1214 and ROPT =  $2 \times 10^{-4}$  (for each different type of atomic species). The maximum values of  $E_{\text{max}}$  and ENAUG are derived from the atomic potential functions (in this case, O and C respectively).

Spin polarised calculation results

After structural relaxation was achieved, calculations for magnetic moments and local spin polarized electronic density of states (SDOS) were performed with a  $12 \times 12 \times 1$   $\kappa$ -point mesh of 75  $\kappa$ -points. Integration of magnetic moment and SDOS were calculated in the PAW sphere.

Figures S1 to S10 are the SDOS plots from the spin polarised DOS calculations, indicating orbital contributions from B, N, and adatom A (H, Li, C, O, Al, Si, P, S), of the full valence and conduction bands region for  $V_{\text{N}}$ ,  $V_{\text{B}}$  and all  $A-V_{\text{N}}$  and  $A-V_{\text{B}}$  surfaces. The figures also include a magnification plot of the VBM/ $E_{\text{F}}$ /CBM region indicating any contributions from s- and p- orbitals from B, N atoms

and  $s$ -,  $p$ -,  $p_x$ ,  $p_y$ , and  $p_z$  orbitals from the adatom atom. Since the magnitude of DOS for the adatom, in the full SDOS diagrams, is not visible at the scale of the plot, the magnitude of the adatom DOS contribution is multiplied by a factor ranging from 10 to 50. This is indicated in the legend of the plot *e.g.* ( $\times 20$ ) means the magnitude of the raw DOS data, for the atomic species, has been multiplied by 20.

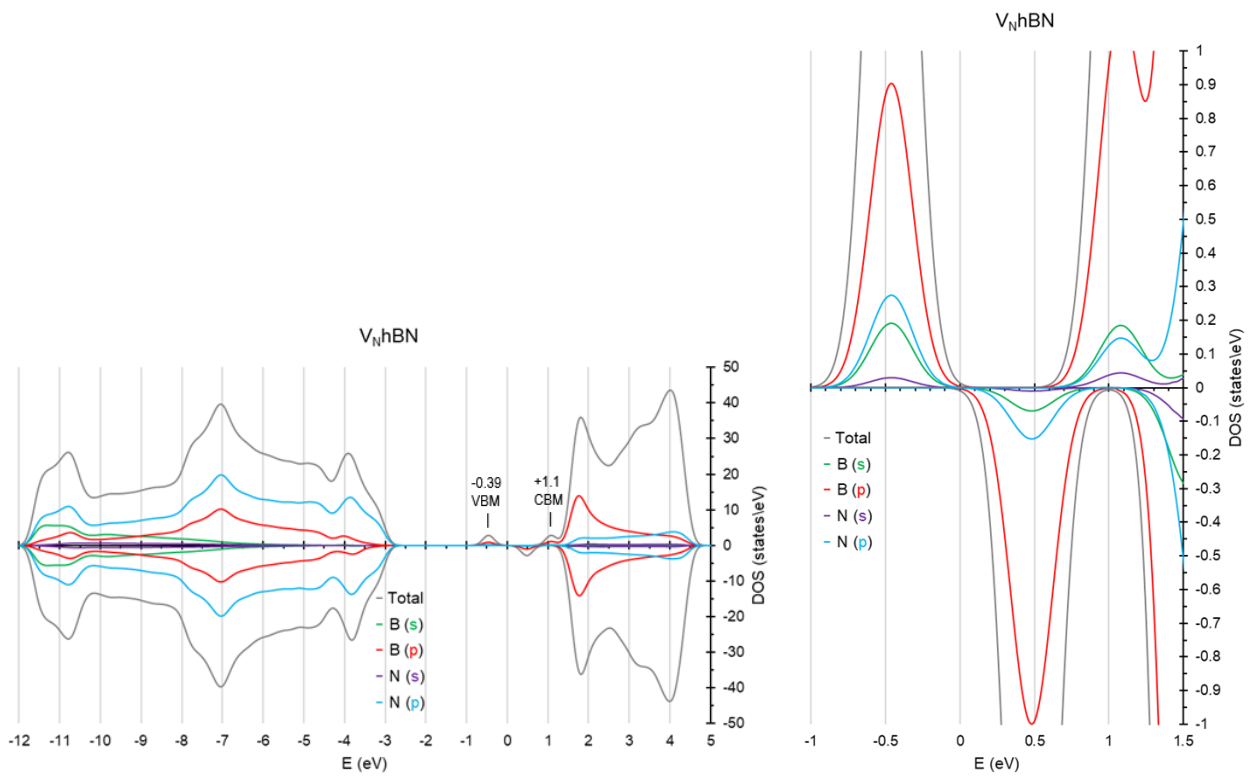

**Figure S1**  $V_N$  - Full SDOS and magnification in the  $E_F$  region

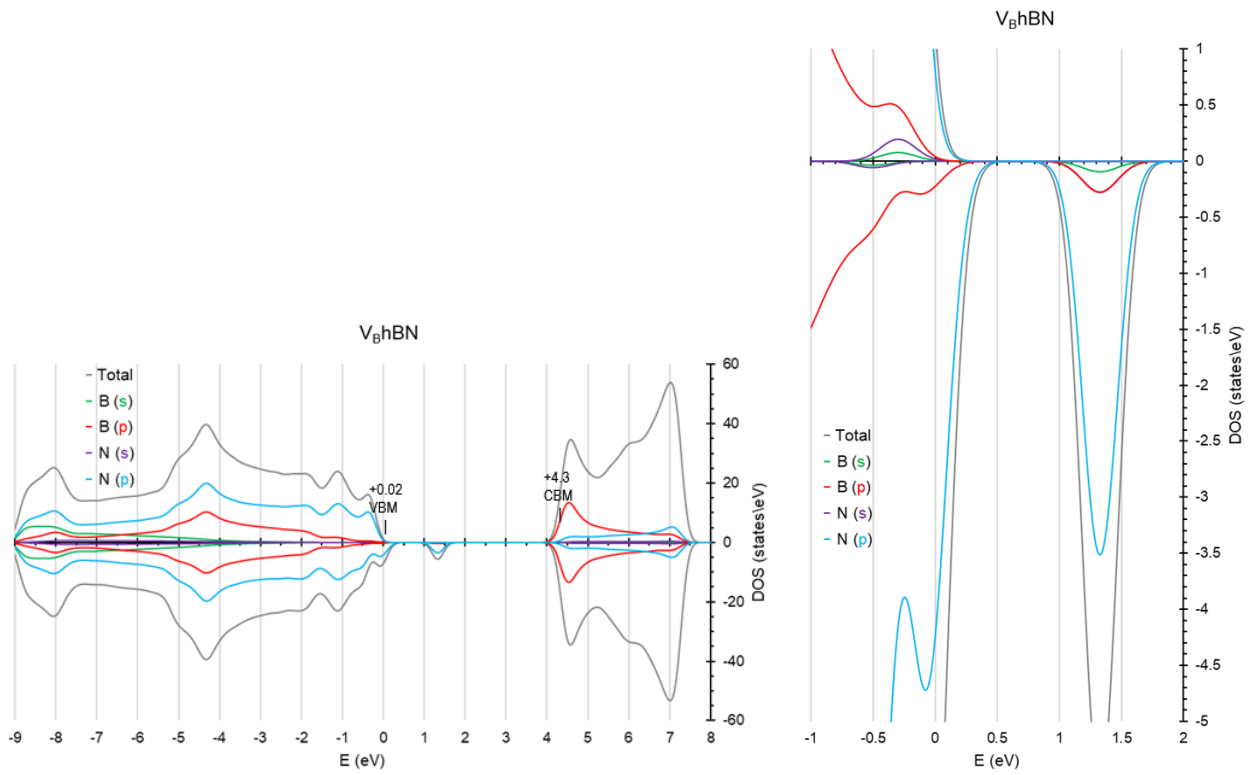

**Figure S2**  $V_B$  - Full SDOS and magnification in the  $E_F$  region.

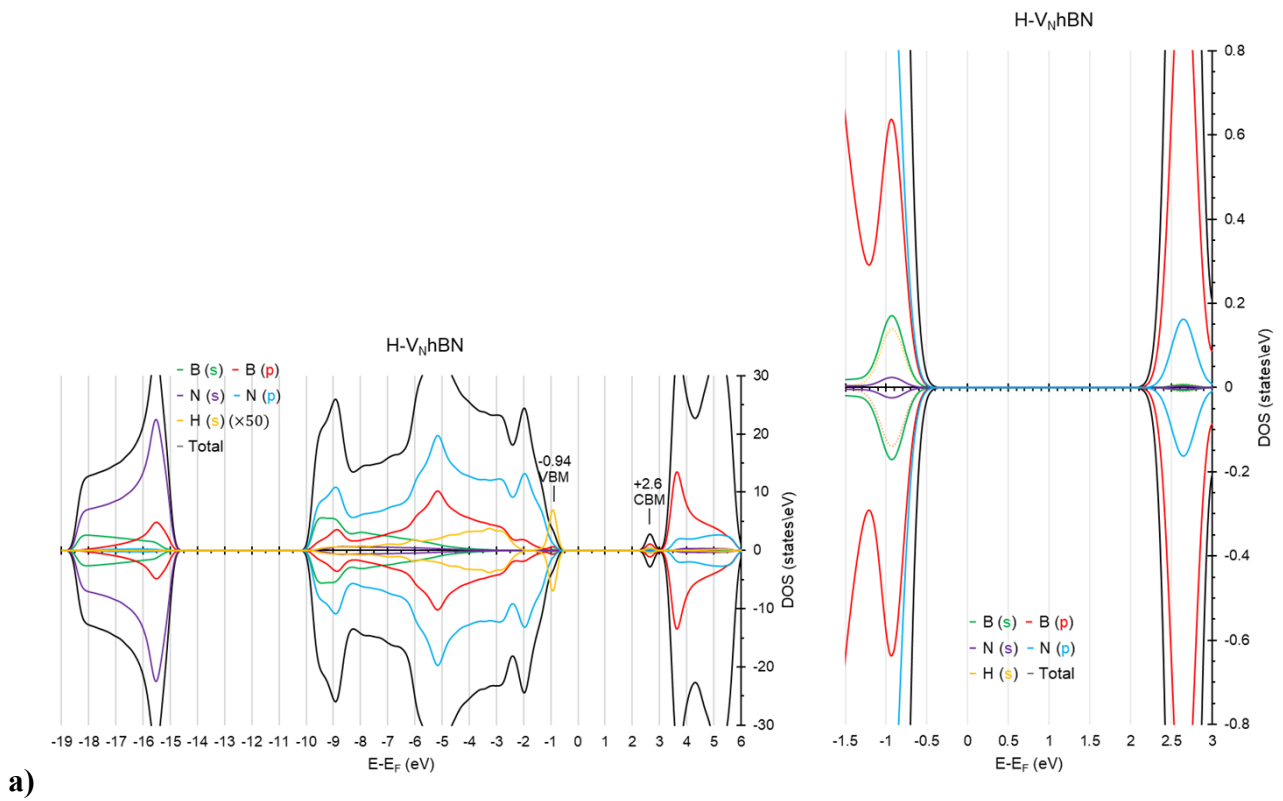

**a)**

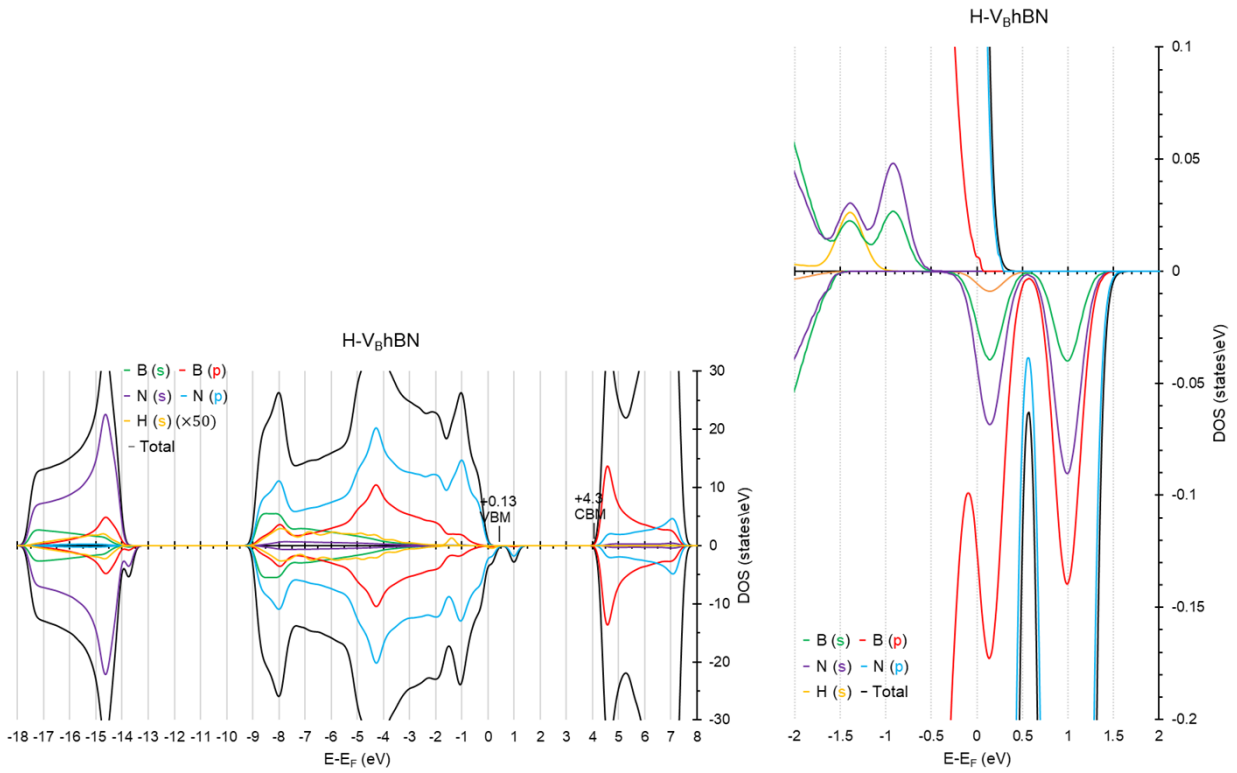

**b)**

**Figure S3 (a) H-V<sub>N</sub> (b) H-V<sub>B</sub>.** Full SDOS and magnification in the E<sub>F</sub> region.

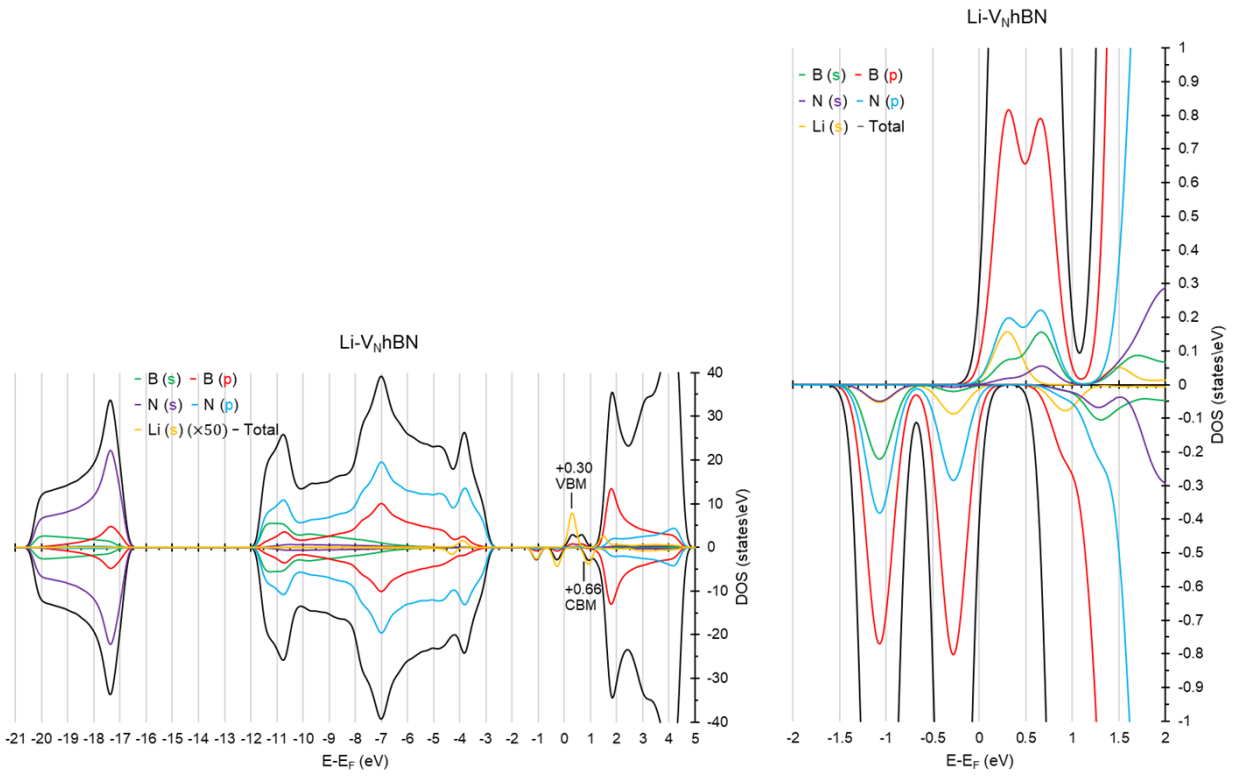

**a)**

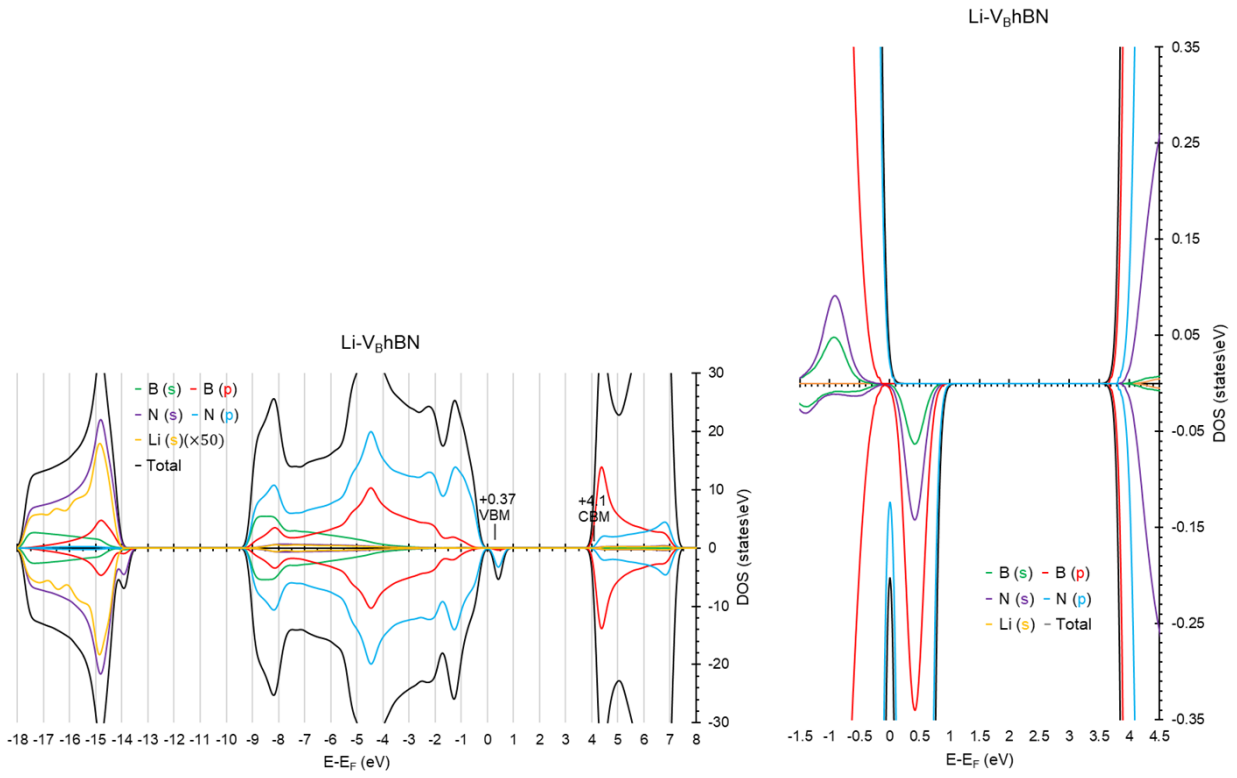

b)

Figure S4 (a) Li-V<sub>N</sub> (b) Li-V<sub>B</sub>. Full SDOS and magnification in the E<sub>F</sub> region.

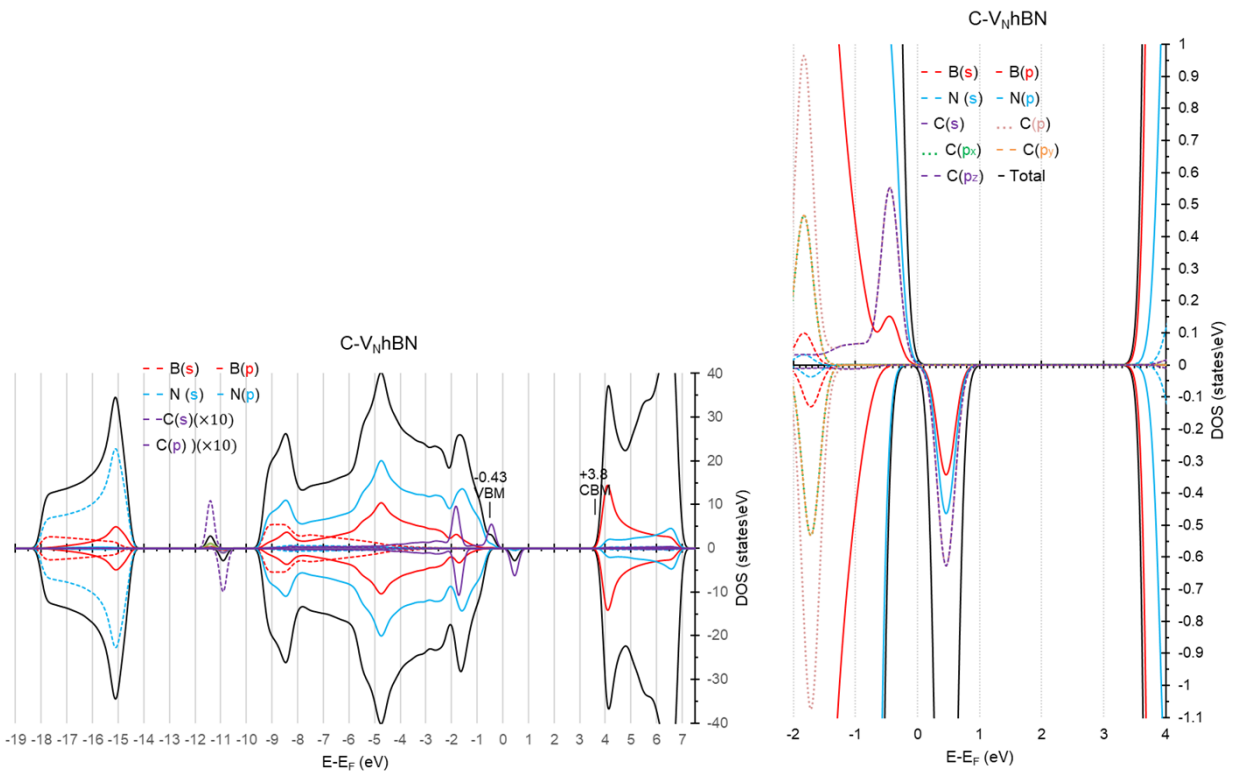

a)

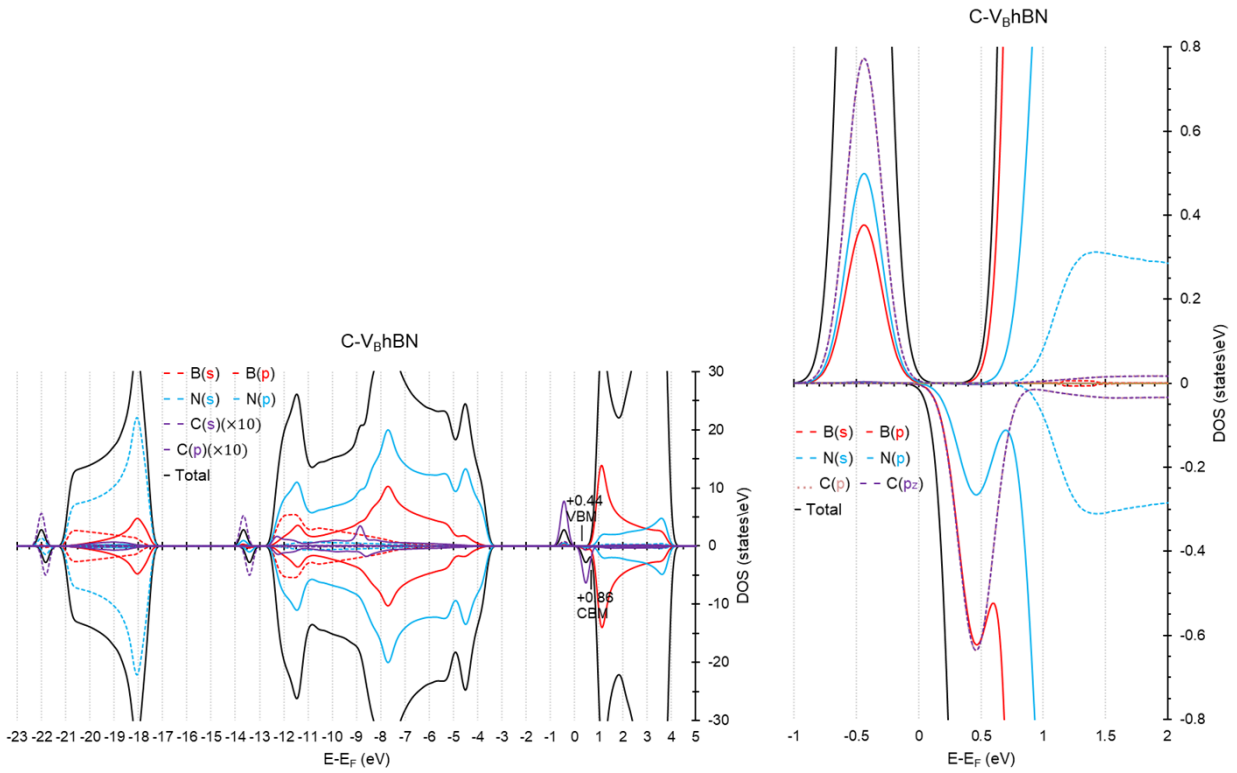

**b)**

**Figure S5 (a) C-V<sub>N</sub> (b) C-V<sub>B</sub>. Full SDOS and magnification in the E<sub>F</sub> region.**

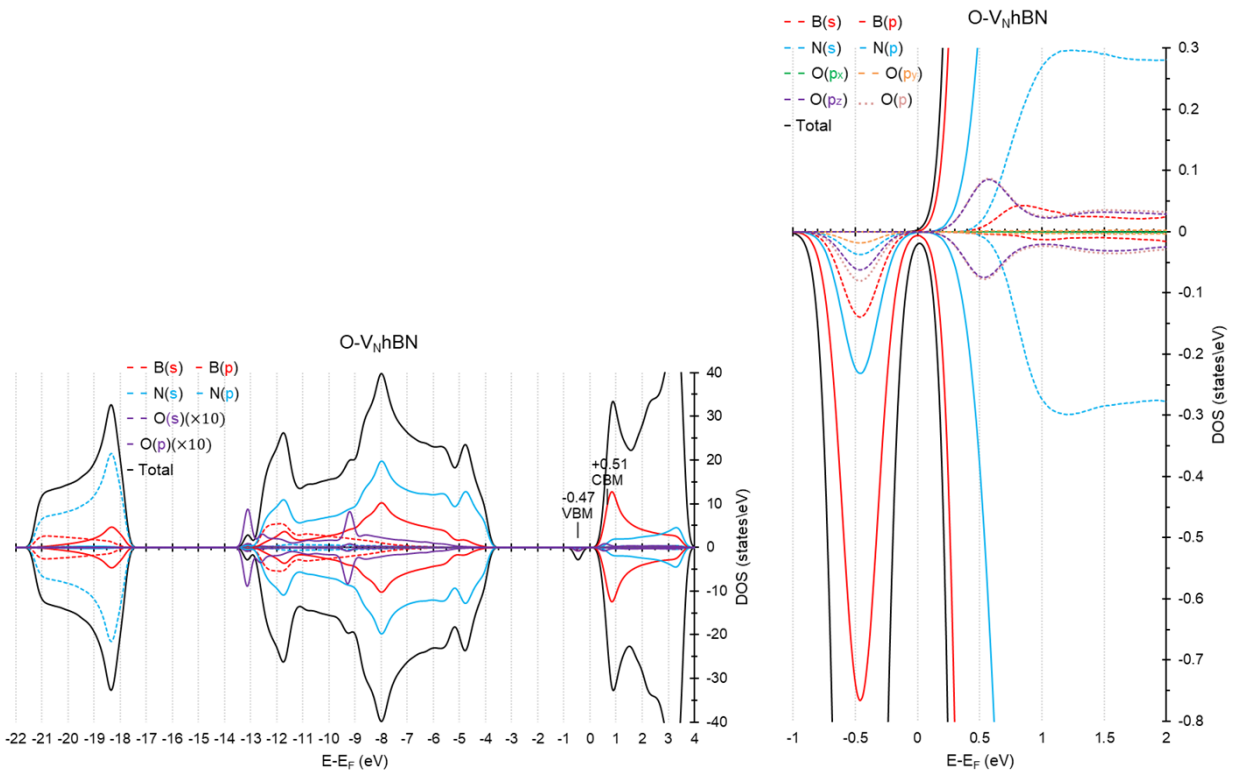

**a)**

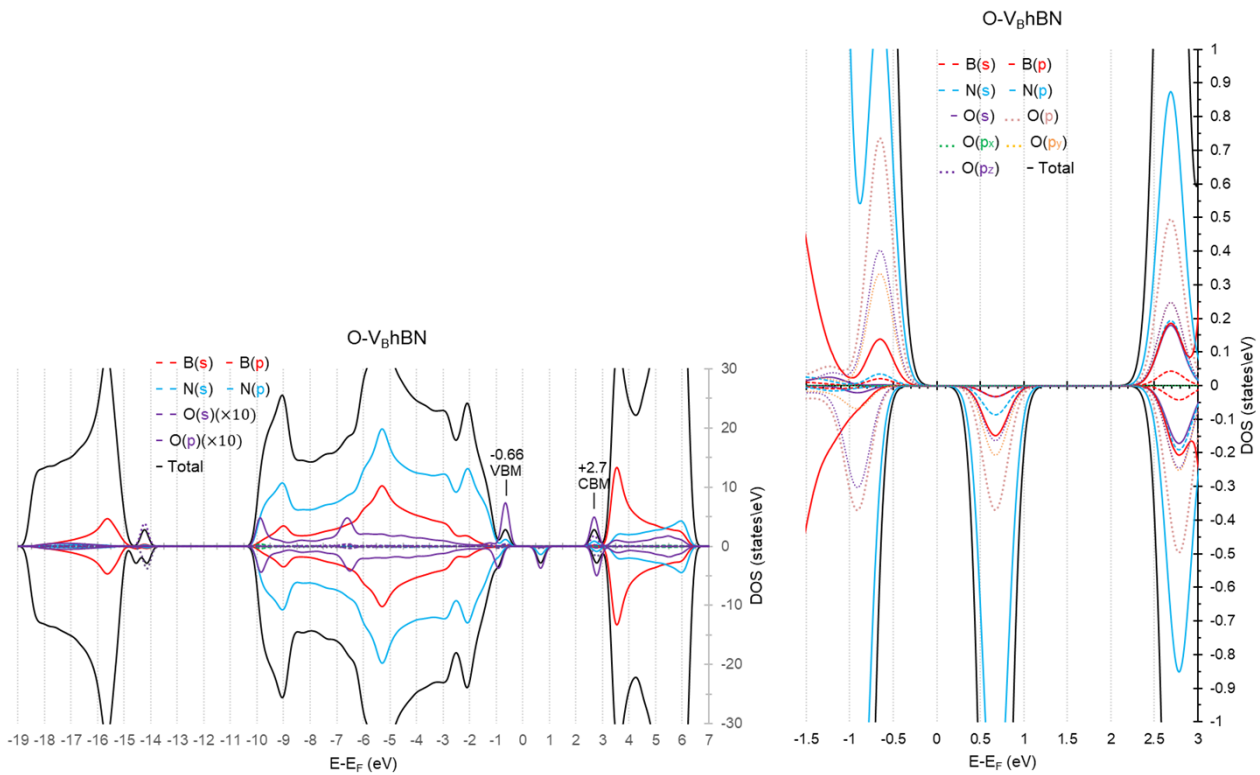

**b)**

**Figure S6** (a) O-V<sub>N</sub> (b) O-V<sub>B</sub>. Full SDOS and magnification in the E<sub>F</sub>.

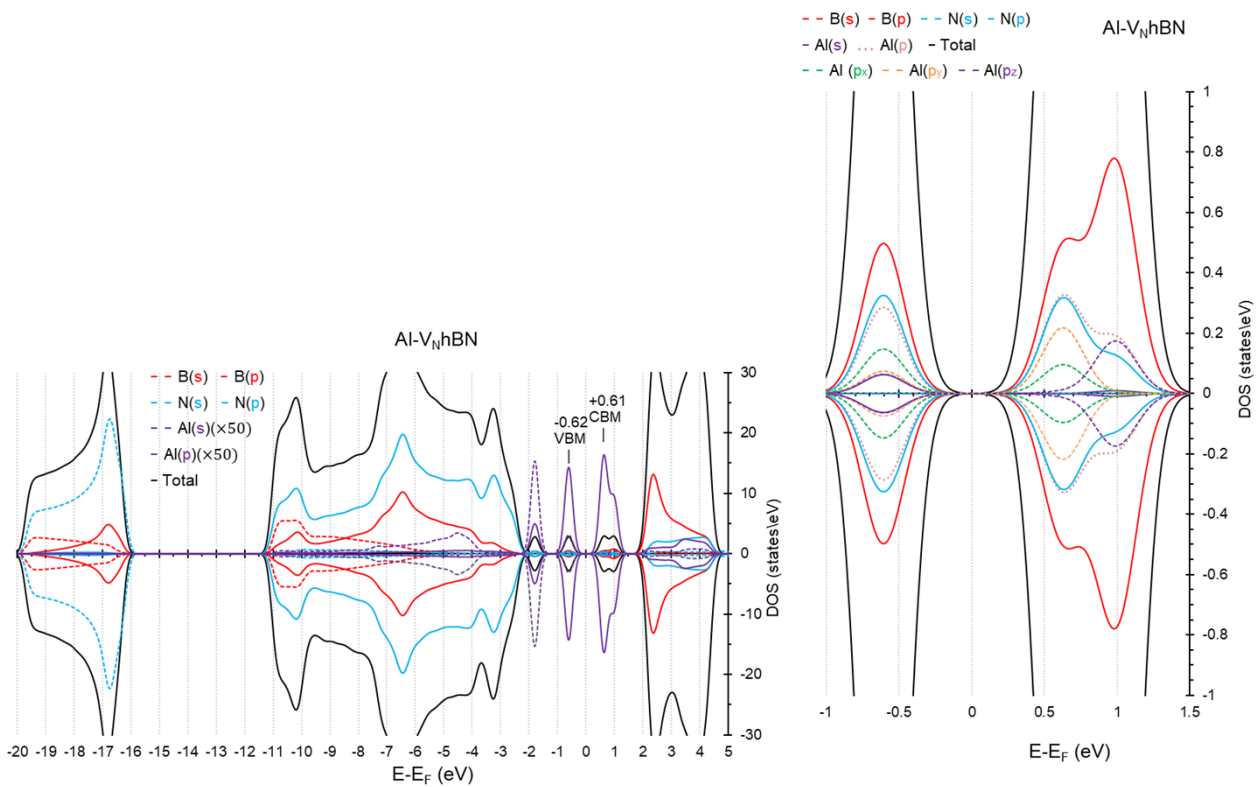

**a)**

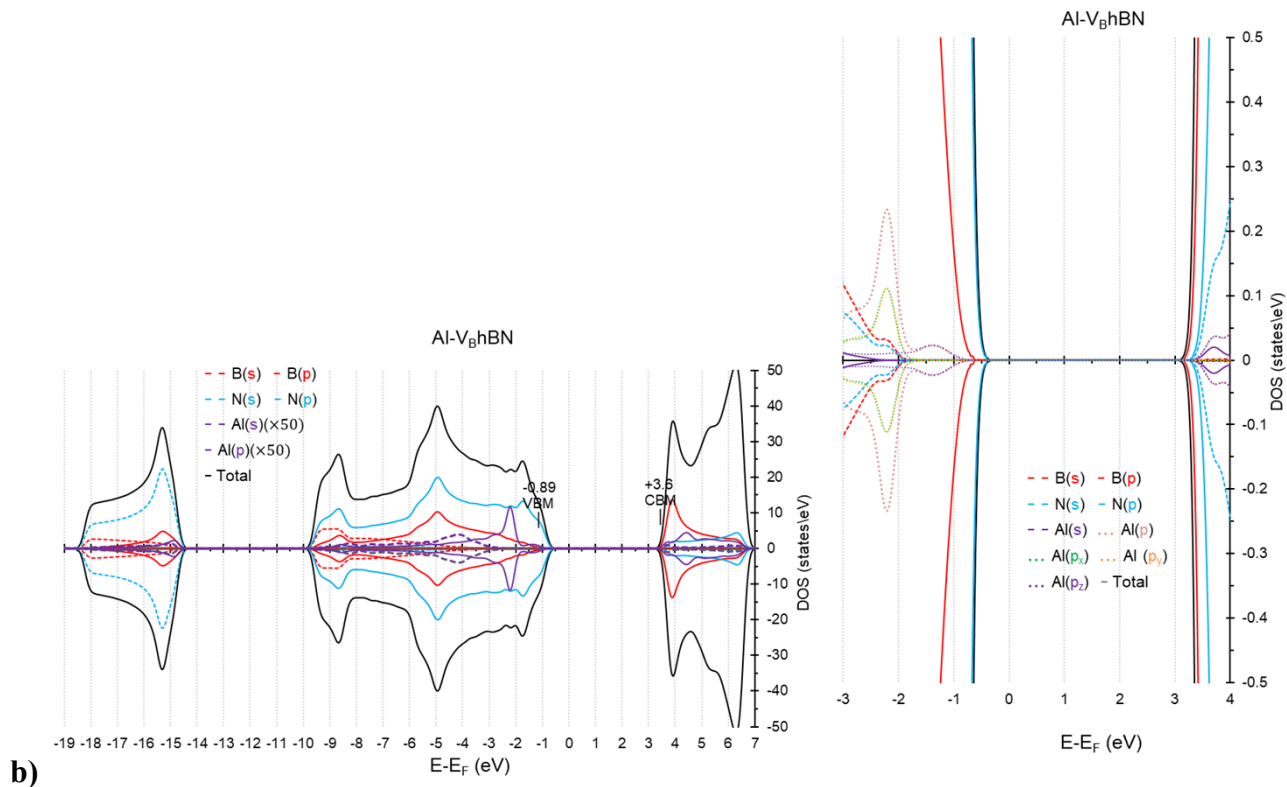

b)

Figure S7 (a)  $\text{Al-V}_N$  (b)  $\text{Al-V}_B$ . Full SDOS and magnification in the  $E_F$  region.

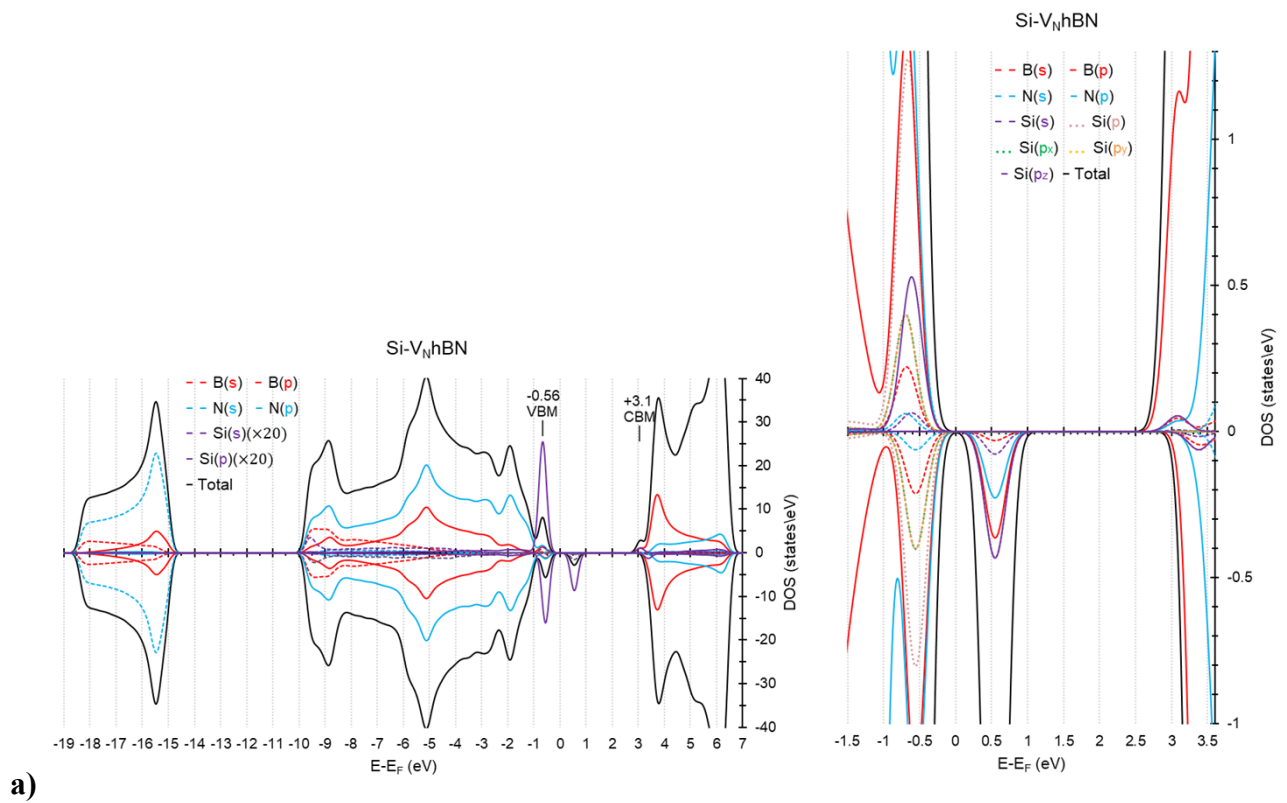

a)



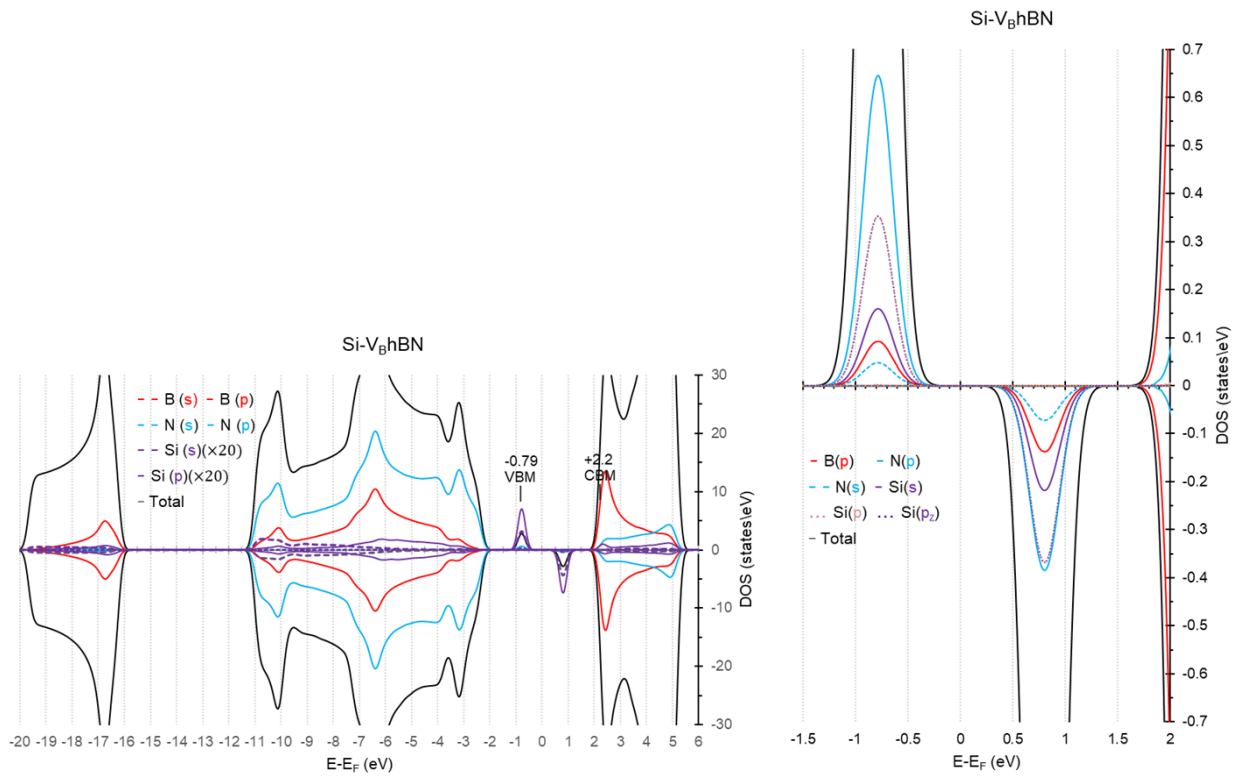

**b)**

**Figure S8** (a) Si-V<sub>N</sub> (b) Si-V<sub>B</sub>. Full SDOS and magnification in the E<sub>F</sub>.

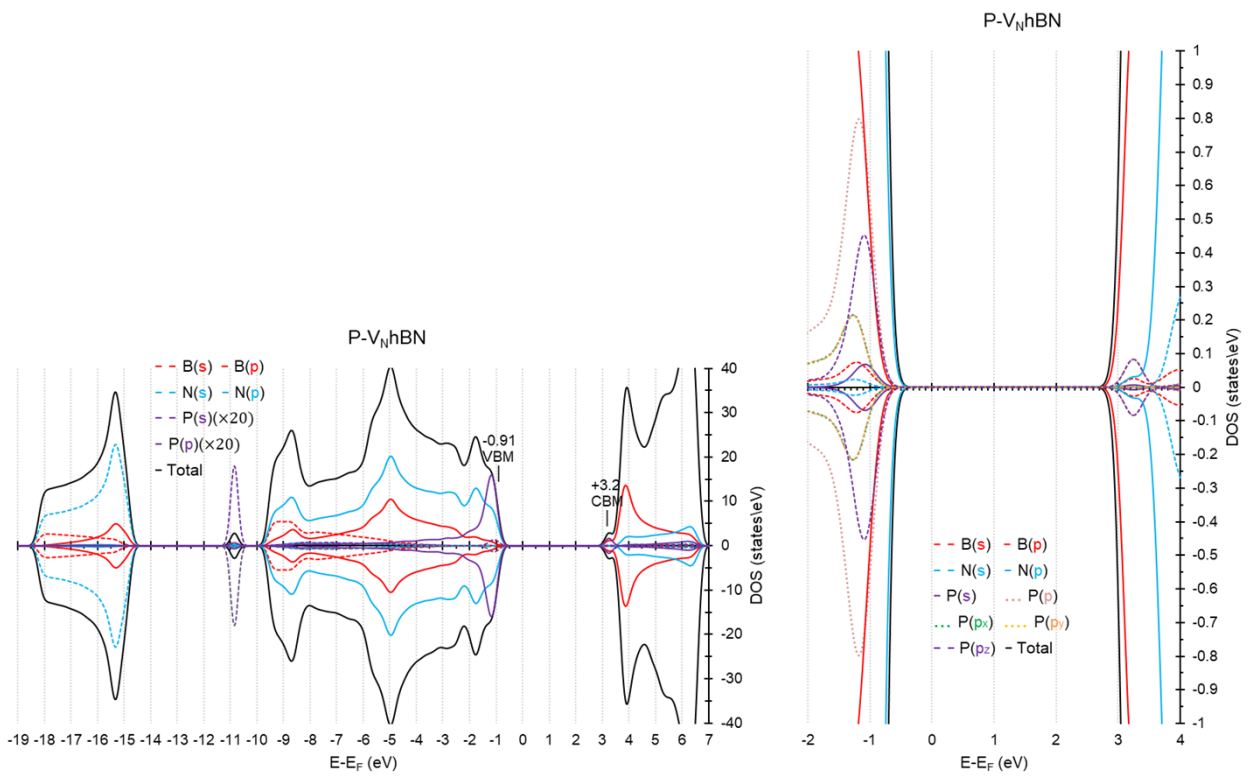

**a)**

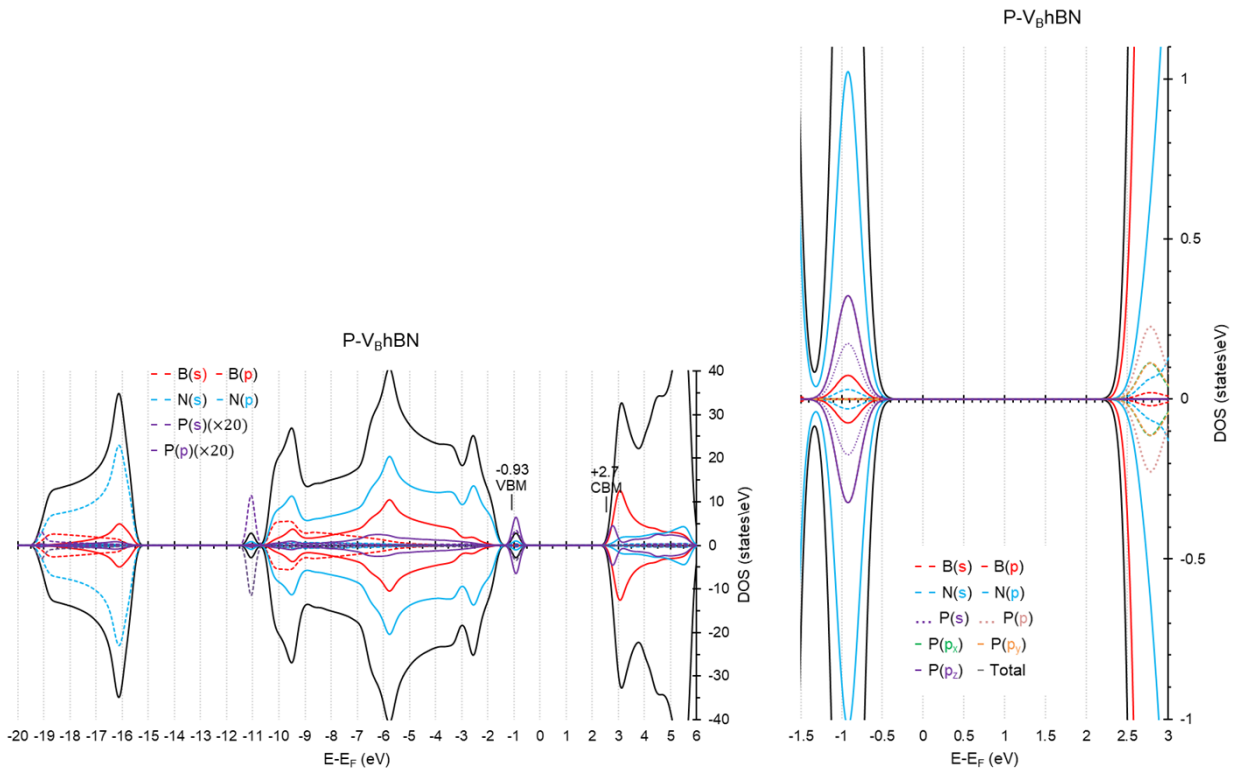

b)

Figure S9 (a) P-V<sub>N</sub> (b) P-V<sub>B</sub>. Full SDOS and magnification in the E<sub>F</sub> region.

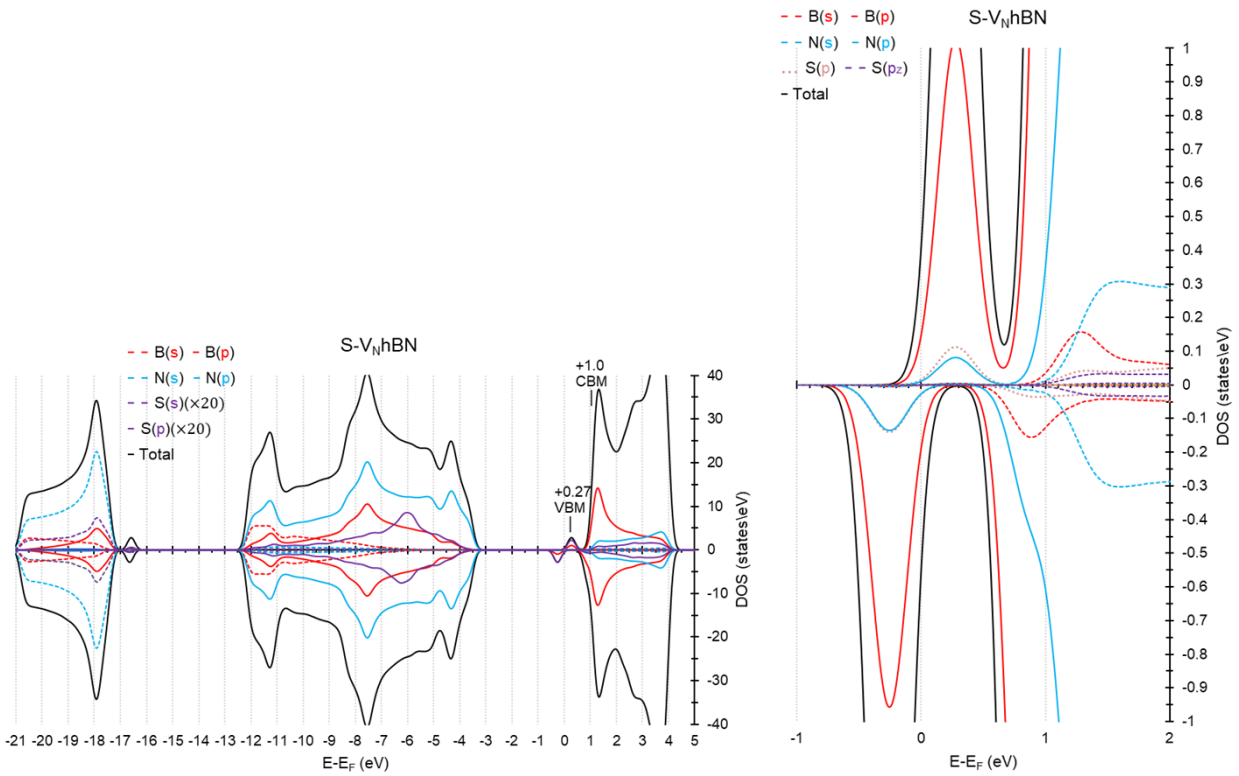

a)

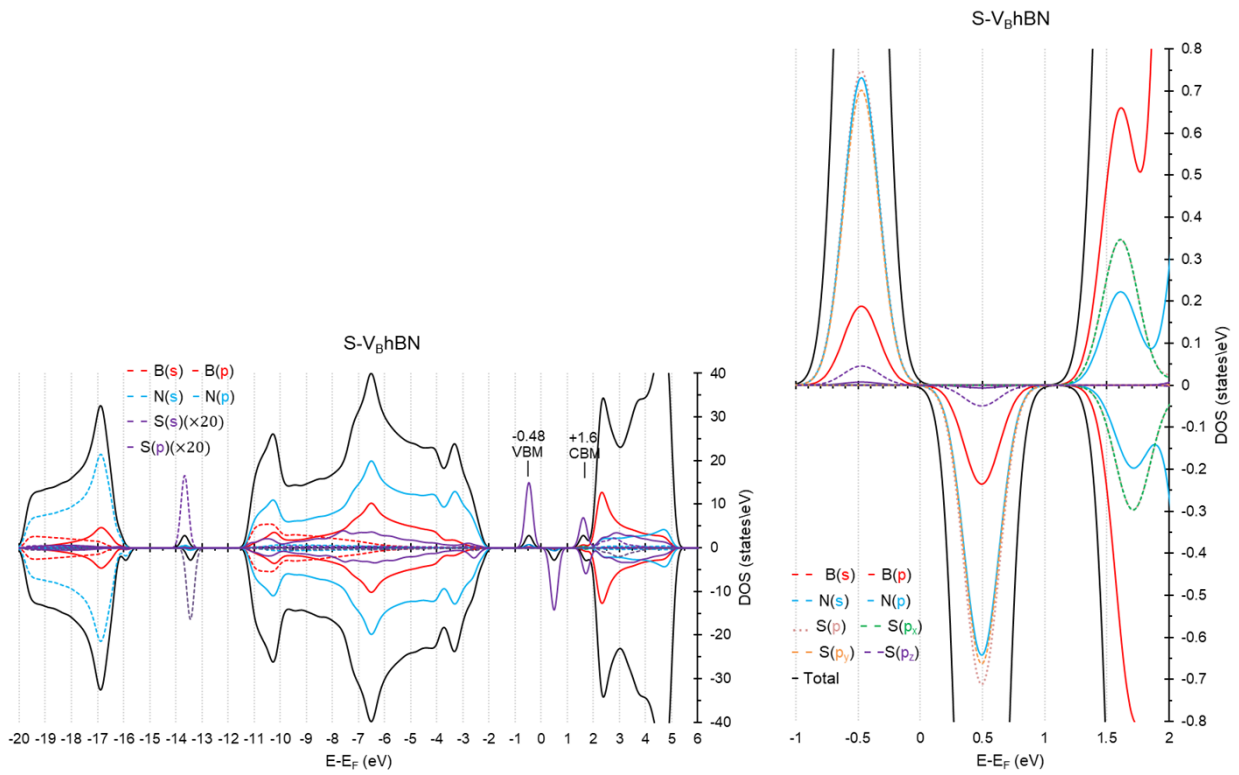

**b)**

**Figure S10** (a) S-V<sub>N</sub> (b) S-V<sub>B</sub>. Full SDOS and magnification in the E<sub>F</sub> region.

Average energy of p-orbital centers,  $\varepsilon_p$

The  $\varepsilon_p$  energy values are with respect to  $E_F$ . The width gives the range of energy levels up to  $E_F$ . All units are in eV.

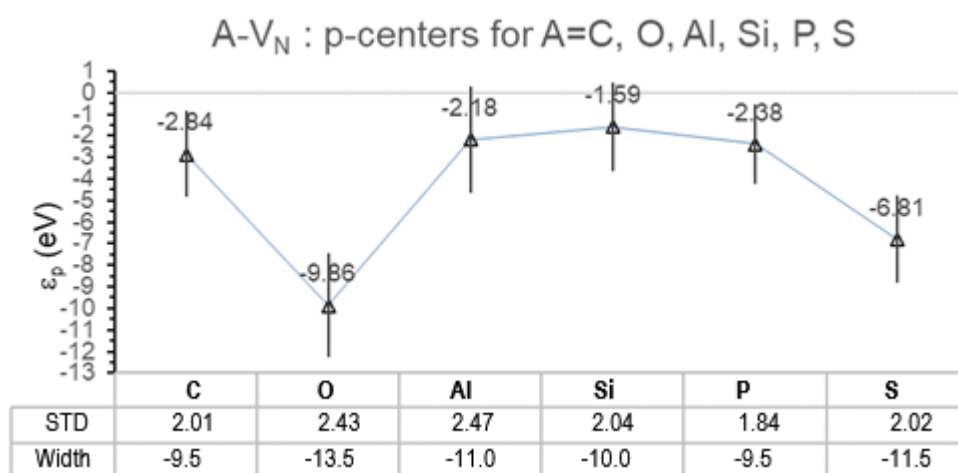

Figure S11 A- $V_N$ .

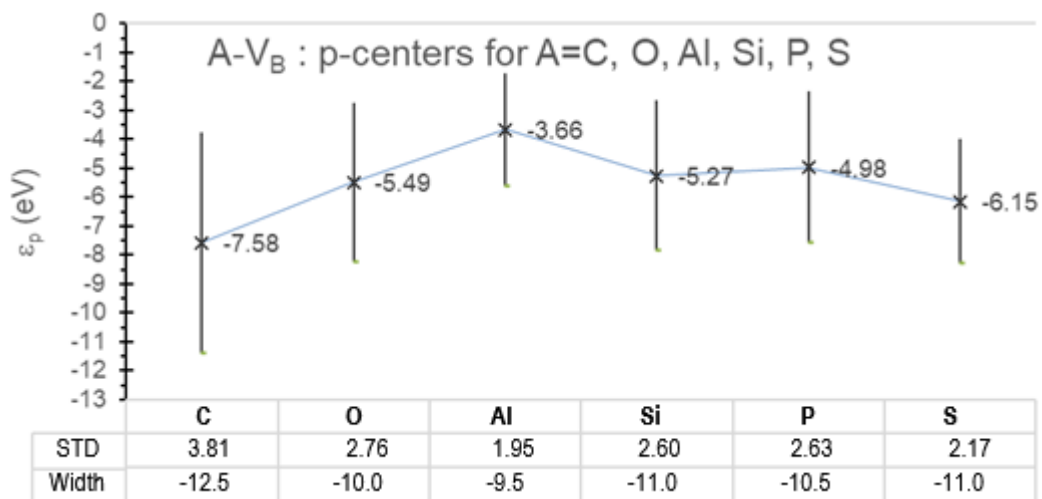

Figure S12 A- $V_B$ .
